# Supplementary material for: Characterization of Staphylococcus aureus from Humans and a Comparison with İsolates of Animal Origin, in North Dakota, United States
Source: PubMed Central journal article supplement (PMC4618867; doi:10.1371/journal.pone.0140497), 2015-10-20
Supplement: pone.0140497.s001.pdf [file pone.0140497.s001.pdf]

|     | arcC |     | aroE |     | glpF |
|-----|------|-----|------|-----|------|
| A01 | 3    | A03 | 4    | A05 | 1    |
| A02 | 3    | A04 | 2    | A06 | 1    |
| B01 | 1    | B03 | 1    | B05 | 1    |
| B02 | 2    | B04 | 4    | B06 | 2    |
| C01 | 1    | C03 | 3    | C05 | 1    |
| C02 | 1    | C04 | 2    | C06 | 8    |
| D01 | 3    | D03 | 4    | D05 | 1    |
| D02 | 8    | D04 | 14   | D06 | 1    |
| E01 | 1    | E03 | 4    | E05 | 1    |
| E02 | 10   | E04 | 13   | E06 | 2    |
| F01 | 1    | F03 | 1    | F05 | 1    |
| F02 | 13   | F04 | 2    | G04 | 1    |
| G01 | 1    | G03 | 4    | G05 | 1    |
| G02 | 2    | H02 | 3    | H04 | 1    |
| H01 | 1    | H03 | 3    | H05 | 2    |

|  | arcC | aroE | glpF | gmk | pta | tpi | yqiL |
|--|------|------|------|-----|-----|-----|------|
|  | 3    | 3    | 1    | 1   | 4   | 4   | 3    |
|  | 1    | 4    | 1    | 4   | 12  | 1   | 10   |
|  | 1    | 1    | 1    | 1   | 1   | 1   | 1    |
|  | 3    | 3    | 1    | 1   | 4   | 4   | 3    |
|  | 1    | 4    | 1    | 4   | 12  | 1   | 10   |
|  | 1    | 4    | 1    | 4   | 12  | 1   | 10   |
|  | 1    | 1    | 1    | 1   | 1   | 1   | 1    |
|  | 1    | 4    | 1    | 4   | 12  | 1   | 10   |
|  | 3    | 3    | 1    | 1   | 4   | 4   | 3    |
|  | 2    | 2    | 2    | 2   | 6   | 3   | 2    |
|  | 1    | 4    | 1    | 4   | 12  | 1   | 10   |
|  | 8    | 2    | 2    | 2   | 6   | 3   | 2    |
|  | 10   | 14   | 8    | 6   | 10  | 3   | 2    |
|  | 13   | 13   | 1    | 1   | 12  | 11  | 13   |
|  | 2    | 2    | 2    | 2   | 2   | 2   | 2    |

| gmk |   | pta |    | tpi |    |
|-----|---|-----|----|-----|----|
| A07 | 1 | A09 | 12 | A11 | 1  |
| A08 | 2 | A10 | 10 | A12 | 11 |
| B07 | 4 | B09 | 12 | B11 | 1  |
| B08 | 6 | B10 | 12 | B12 | 2  |
| C07 | 4 | C09 | 1  | C11 | 1  |
| C08 | 1 | C10 | 2  | D10 | 4  |
| D07 | 1 | D09 | 12 | D11 | 4  |
| D08 | 2 | E08 | 4  | E10 | 1  |
| E07 | 4 | E09 | 4  | E11 | 3  |
| F06 | 1 | F08 | 12 | F10 | 1  |
| F07 | 1 | F09 | 6  | F11 | 1  |
| G06 | 4 | G08 | 1  | G10 | 4  |
| G07 | 2 | G09 | 12 | G11 | 3  |
| H06 | 1 | H08 | 4  | H10 | 1  |
| H07 | 4 | H09 | 6  | H11 | 3  |

| ST | code |
|----|------|
| 8  | 157  |
| 5  | 181  |
| 1  | 186  |
| 8  | 192  |
| 5  | 160  |
| 5  | 220  |
| 1  | 230  |
| 5  | 244  |
| 8  | 247  |
| 30 | 257  |
| 5  | 266  |
| 34 | 268  |
| 45 | 275  |
| 15 | 288  |
| 39 | 294  |

yqil

|    |    |
|----|----|
| 1  | 3  |
| 2  | 10 |
| 3  | 1  |
| 4  | 3  |
| 5  | 10 |
| 6  | 10 |
| 7  | 1  |
| 8  | 10 |
| 9  | 3  |
| 10 | 2  |
| 11 | 10 |
| 12 | 2  |
| 13 | 2  |
| 14 | 13 |
| 15 | 2  |
