# Supplementary material for: Characterization of Staphylococcus aureus from Humans and a Comparison with İsolates of Animal Origin, in North Dakota, United States
Source: PubMed Central journal article supplement (PMC4618867; doi:10.1371/journal.pone.0140497), 2015-10-20
Supplement: pone.0140497.s002.pdf [file pone.0140497.s002.pdf]

| Sample | Infection | Date        | Staph       | 16S | mecA | Luk |
|--------|-----------|-------------|-------------|-----|------|-----|
| 1      | Nasal     | Fall 2010   | epidermidis |     |      |     |
| 2      | Nasal     | Fall 2010   | aureus      | 1   | 0    | 0   |
| 3      | Nasal     | Fall 2010   | aureus      | 1   | 0    | 0   |
| 4      | Nasal     | Fall 2010   | epidermidis |     |      |     |
| 5      | Nasal     | Fall 2010   | aureus      | 1   | 0    | 0   |
| 6      | Nasal     | Fall 2010   | epidermidis |     |      |     |
| 7      | Nasal     | Fall 2010   | aureus      | 1   | 0    | 0   |
| 8      | Nasal     | Fall 2010   | epidermidis |     |      |     |
| 9      | Nasal     | Fall 2010   | epidermidis |     |      |     |
| 10     | Nasal     | Fall 2010   | aureus      | 1   | 0    | 0   |
| 11     | Nasal     | Fall 2010   | aureus      | 1   | 0    | 0   |
| 12     | Nasal     | Fall 2010   | epidermidis |     |      |     |
| 13     | Nasal     | Fall 2010   | aureus      | 1   | 0    | 0   |
| 14     | Nasal     | Fall 2010   | aureus      | 1   | 0    | 0   |
| 15     | Nasal     | Fall 2010   | aureus      | 1   | 0    | 0   |
| 16     | Nasal     | Fall 2010   | aureus      | 1   | 0    | 0   |
| 17     | Nasal     | Fall 2010   | warneri     |     |      |     |
| 18     | Nasal     | Fall 2010   | epidermidis |     |      |     |
| 19     | Nasal     | Fall 2010   | aureus      | 1   | 0    | 0   |
| 20     | Nasal     | Fall 2010   | warneri     |     |      |     |
| 21     | Nasal     | Fall 2010   | epidermidis |     |      |     |
| 22     | Nasal     | Fall 2010   | epidermidis |     |      |     |
| 23     | Nasal     | Fall 2010   | aureus      | 1   | 0    | 0   |
| 24DG   | Nasal     | Fall 2010   | aureus      | 1   | 0    | 0   |
| 25     | Nasal     | Fall 2010   | aureus      | 1   | 0    | 0   |
| 26     | Nasal     | Fall 2010   | aureus      | 1   | 0    | 0   |
| 27     | Nasal     | Fall 2010   | aureus      | 1   | 0    | 0   |
| 28     | Nasal     | Fall 2010   | epidermidis |     |      |     |
| 29     | Nasal     | Fall 2010   | aureus      | 1   | 0    | 0   |
| 30     | Nasal     | Spring 2011 | aureus      | 1   | 0    | 0   |
| 31     | Nasal     | Spring 2011 | aureus      | 1   | 0    | 0   |
| 32     | Nasal     | Spring 2011 | aureus      | 1   | 0    | 0   |
| 33     | Nasal     | Spring 2011 | aureus      | 1   | 0    | 0   |
| 34     | Nasal     | Spring 2011 | aureus      | 1   | 0    | 0   |
| 35     | Nasal     | Spring 2011 | aureus      | 1   | 0    | 0   |
| 36     | Nasal     | Spring 2011 | aureus      | 1   | 0    | 0   |
| 37     | Nasal     | Spring 2011 | aureus      | 1   | 0    | 0   |
| 38     | Nasal     | Spring 2011 | epidermidis |     |      |     |
| 39     | Nasal     | Spring 2011 | aureus      | 1   | 0    | 0   |
| 40     | Nasal     | Spring 2011 | epidermidis |     |      |     |
| 41     | Nasal     | Spring 2011 | aureus      | 1   | 0    | 0   |
| 42     | Nasal     | Spring 2011 | aureus      | 1   | 0    | 0   |
| 43     | Nasal     | Spring 2011 | aureus      | 1   | 0    | 0   |
| 44     | Nasal     | Spring 2011 | aureus      | 1   | 0    | 0   |
| 45     | Nasal     | Spring 2011 | aureus      | 1   | 0    | 0   |
| 46     | Nasal     | Spring 2011 | aureus      | 1   | 0    | 0   |

|    |       |             |             |   |   |   |
|----|-------|-------------|-------------|---|---|---|
| 47 | Nasal | Spring 2011 | aureus      | 1 | 0 | 0 |
| 48 | Nasal | Spring 2011 | epidermidis |   |   |   |
| 49 | Nasal | Spring 2011 | aureus      | 1 | 0 | 0 |
| 50 | Nasal | Spring 2011 | aureus      | 1 | 0 | 0 |
| 51 | Nasal | Spring 2011 | aureus      | 1 | 0 | 0 |
| 52 | Nasal | Spring 2011 | epidermidis |   |   |   |
| 53 | Nasal | Spring 2011 | aureus      | 1 | 0 | 0 |
| 54 | Nasal | Spring 2011 | aureus      | 1 | 0 | 0 |
| 55 | Nasal | Spring 2011 | aureus      | 1 | 0 | 0 |
| 56 | Nasal | Spring 2011 | epidermidis |   |   |   |
| 57 | Nasal | Spring 2011 | aureus      | 1 | 0 | 0 |
| 58 | Nasal | Spring 2011 | aureus      | 1 | 0 | 0 |
| 59 | Nasal | Spring 2011 | aureus      | 1 | 0 | 0 |
| 60 | Nasal | Spring 2011 | epidermidis |   |   |   |

29

31
