# Supplementary material for: Characterization of Staphylococcus aureus from Humans and a Comparison with İsolates of Animal Origin, in North Dakota, United States
Source: PubMed Central journal article supplement (PMC4618867; doi:10.1371/journal.pone.0140497), 2015-10-20
Supplement: pone.0140497.s003.pdf [file pone.0140497.s003.pdf]

| Sample | Cod Hospital | Infection | Date       | Staph  | 16S | mecA | Luk |
|--------|--------------|-----------|------------|--------|-----|------|-----|
| 1      | 61-B         | blood     | 19-07-2010 | aureus | 1   | 1    | 1   |
| 2      | 89-W         | wound     | 19-07-2010 | aureus | 1   | 1    | 0   |
| 3      | 136-W        | wound     | 19-07-2010 | aureus | 1   | 1    | 0   |
| 4      | 147-B        | blood     | 19-07-2010 | aureus | 1   | 1    | 0   |
| 5      | 168-B        | blood     | 19-07-2010 | aureus | 1   | 1    | 0   |
| 6      | 169-B        | blood     | 19-07-2010 | aureus | 1   | 1    | 0   |
| 7      | 44-B         | blood     | 19-07-2010 | aureus | 1   | 1    | 0   |
| 8      | 25-B         | blood     | 19-07-2010 | aureus | 1   | 1    | 0   |
| 9      | 16-B         | blood     | 19-07-2010 | aureus | 1   | 1    | 1   |
| 10     | 23-B         | blood     | 19-07-2010 | aureus | 1   | 1    | 0   |
| 11     | 65-B         | blood     | 19-07-2010 | aureus | 1   | 1    | 0   |
| 12     | 24-B         | blood     | 19-07-2010 | aureus | 1   | 1    | 1   |
| 13     | 167-W        | wound     | 19-07-2010 | aureus | 1   | 1    | 0   |
| 14     | 21-B         | blood     | 19-07-2010 | aureus | 1   | 1    | 0   |
| 15     | 15-B         | blood     | 19-07-2010 | aureus | 1   | 1    | 0   |
| 16     | 73-B         | blood     | 19-07-2010 | aureus | 1   | 1    | 1   |
| 17     | 19-B         | blood     | 19-07-2010 | aureus | 1   | 1    | 0   |
| 18     | 102-B        | blood     | 19-07-2010 | aureus | 1   | 1    | 0   |
| 19     | 17-W         | wound     | 19-07-2010 | aureus | 1   | 1    | 0   |
| 20     | 146-B1       | blood     | 19-07-2010 | aureus | 1   | 1    | 0   |
| 21     | 78-B         | blood     | 19-07-2010 | aureus | 1   | 1    | 0   |
| 22     | 98-B         | blood     | 19-07-2010 | aureus | 1   | 1    | 0   |
| 23     | 129-B        | blood     | 19-07-2010 | aureus | 1   | 1    | 0   |
| 24     | 106-B        | blood     | 19-07-2010 | aureus | 1   | 1    | 0   |
| 25     | 27-B         | blood     | 19-07-2010 | aureus | 1   | 1    | 0   |
| 26     | 18-W         | wound     | 19-07-2010 | aureus | 1   | 1    | 0   |
| 27     | 134-B        | blood     | 19-07-2010 | aureus | 1   | 1    | 0   |
| 28     | 138-W        | wound     | 19-07-2010 | aureus | 1   | 1    | 0   |
| 29     | 31-B         | blood     | 19-07-2010 | aureus | 1   | 1    | 0   |
| 30     | 137-B        | blood     | 19-07-2010 | aureus | 1   | 1    | 0   |
| 31     | 28-B         | blood     | 19-07-2010 | aureus | 1   | 1    | 0   |
| 32     | 103-B        | blood     | 19-07-2010 | aureus | 1   | 1    | 0   |
| 33     | 56-B         | blood     | 19-07-2010 | aureus | 1   | 1    | 0   |
| 34     | 55-B         | blood     | 19-07-2010 | aureus | 1   | 1    | 0   |
| 35     | 64-B         | blood     | 19-07-2010 | aureus | 1   | 1    | 0   |
| 36     | 57-B         | blood     | 19-07-2010 | aureus | 1   | 0    | 0   |
| 37     | 90-B         | blood     | 19-07-2010 | aureus | 1   | 1    | 1   |
| 38     | 94-B         | blood     | 19-07-2010 | aureus | 1   | 1    | 0   |
| 39     | 99-B         | blood     | 19-07-2010 | aureus | 1   | 1    | 0   |
| 40     | 146-B        | blood     | 19-07-2010 | aureus | 1   | 1    | 0   |
| 41     | 166-B        | blood     | 19-07-2010 | aureus | 1   | 1    | 0   |
| 42     | 72-B         | blood     | 19-07-2010 | aureus | 1   | 1    | 0   |
| 43     | 24-B         | blood     | 19-07-2010 | aureus | 1   | 1    | 0   |
| 44     | 41-B         | blood     | 19-07-2010 | aureus | 1   | 1    | 0   |
| 45     | 130-B        | blood     | 19-07-2010 | aureus | 1   | 1    | 0   |
| 46     | 104-B        | blood     | 19-07-2010 | aureus | 1   | 1    | 0   |

|    |        |       |            |        |   |   |   |
|----|--------|-------|------------|--------|---|---|---|
| 47 | 62-B   | blood | 19-07-2010 | aureus | 1 | 1 | 0 |
| 48 | 71-B   | blood | 19-07-2010 | aureus | 1 | 1 | 0 |
| 49 | 42-B   | blood | 19-07-2010 | aureus | 1 | 1 | 0 |
| 50 | 128-B1 | blood | 19-07-2010 | aureus | 1 | 1 | 0 |
| 51 | 91-B   | blood | 19-07-2010 | aureus | 1 | 1 | 0 |
| 52 | 148-B  | blood | 19-07-2010 | aureus | 1 | 1 | 1 |
| 53 | 43-B   | blood | 19-07-2010 | aureus | 1 | 1 | 0 |
| 54 | 119-B  | blood | 19-07-2010 | aureus | 1 | 1 | 0 |
| 55 | 3-B    | blood | 19-07-2010 | aureus | 1 | 1 | 0 |
| 56 | 30-B   | blood | 19-07-2010 | aureus | 1 | 1 | 0 |
| 57 | 170-B  | blood | 19-07-2010 | aureus | 1 | 1 | 0 |
| 58 | 11-B   | blood | 19-07-2010 | aureus | 1 | 1 | 0 |
| 59 | 6-B    | blood | 19-07-2010 | aureus | 1 | 1 | 0 |
| 60 | 133-W  | wound | 19-07-2010 | aureus | 1 | 1 | 0 |
| 61 | 15-B   | blood | 19-07-2010 | aureus | 1 | 1 | 0 |
| 62 | 8-B    | blood | 19-07-2010 | aureus | 1 | 1 | 0 |
| 63 | 97-B   | blood | 19-07-2010 | aureus | 1 | 1 | 0 |
| 64 | 132-W  | wound | 19-07-2010 | aureus | 1 | 1 | 0 |
| 65 | 74-B   | blood | 19-07-2010 | aureus | 1 | 1 | 0 |
| 66 | 63-B   | blood | 19-07-2010 | aureus | 1 | 1 | 0 |
| 67 | 139-B  | blood | 19-07-2010 | aureus | 1 | 1 | 0 |
| 68 | 7-B    | blood | 19-07-2010 | aureus | 1 | 1 | 0 |
| 69 | 131-W2 | wound | 19-07-2010 | aureus | 1 | 1 | 0 |
| 70 | 34-B   | blood | 19-07-2010 | aureus | 1 | 1 | 1 |
| 71 | 29-B   | blood | 19-07-2010 | aureus | 1 | 1 | 0 |
| 72 | 40-B   | blood | 19-07-2010 | aureus | 1 | 1 | 0 |
| 73 | 96-B   | blood | 19-07-2010 | aureus | 1 | 1 | 0 |
| 74 | 49-B   | blood | 19-07-2010 | aureus | 1 | 1 | 1 |
| 75 | 92-B1  | blood | 19-07-2010 | aureus | 1 | 0 | 0 |
| 76 | 107-B  | blood | 19-07-2010 | aureus | 1 | 1 | 0 |
| 77 | 38-B   | blood | 19-07-2010 | aureus | 1 | 1 | 0 |
| 78 | 39-B   | blood | 19-07-2010 | aureus | 1 | 1 | 0 |
| 79 | 2-B    | blood | 19-07-2010 | aureus | 1 | 1 | 0 |
| 80 | 115-B  | blood | 19-07-2010 | aureus | 1 | 1 | 0 |
| 81 | 75-B   | blood | 19-07-2010 | aureus | 1 | 1 | 0 |
| 82 | 52-B   | blood | 19-07-2010 | aureus | 1 | 1 | 0 |
| 83 | 9-B    | blood | 19-07-2010 | aureus | 1 | 1 | 0 |
| 84 | 12-B   | blood | 19-07-2010 | aureus | 1 | 1 | 0 |
| 85 | 118-B  | blood | 19-07-2010 | aureus | 1 | 1 | 1 |
| 86 | 4-B    | blood | 19-07-2010 | aureus | 1 | 1 | 0 |
| 87 | 20-B   | blood | 19-07-2010 | aureus | 1 | 1 | 0 |
| 88 | 144-B  | blood | 19-07-2010 | aureus | 1 | 1 | 0 |
| 89 | 17-B   | blood | 19-07-2010 | aureus | 1 | 1 | 1 |
| 90 | 13-B   | blood | 19-07-2010 | aureus | 1 | 1 | 1 |
| 91 | 31-B   | blood | 19-07-2010 | aureus | 1 | 1 | 0 |
| 92 | 5-B    | blood | 19-07-2010 | aureus | 1 | 1 | 0 |
| 93 | 100-B  | blood | 19-07-2010 | aureus | 1 | 1 | 0 |

|     |             |       |            |        |    |   |   |
|-----|-------------|-------|------------|--------|----|---|---|
| 94  | 101-B       | blood | 19-07-2010 | aureus | 1  | 1 | 0 |
| 95  | 1-B         | blood | 19-07-2010 | aureus | 1  | 1 | 0 |
| 96  | 135-B       | blood | 19-07-2010 | aureus | 1  | 1 | 0 |
| 97  | 58-B        | blood | 19-07-2010 | aureus | 1  | 1 | 0 |
| 98  | 105-B       | blood | 19-07-2010 | aureus | 1  | 1 | 0 |
| 99  | 40-B        | blood | 19-07-2010 | aureus | 1  | 1 | 0 |
| 100 | 15-B        | blood | 19-07-2010 | aureus | 1  | 1 | 0 |
| 101 | 50-B        | blood | 19-07-2010 | aureus | 1  | 1 | 0 |
| 102 | 48-B        | blood | 19-07-2010 | aureus | 1  | 0 | 0 |
| 103 | 127-B       | blood | 19-07-2010 | aureus | 1  | 1 | 0 |
| 104 | 124-B       | blood | 19-07-2010 | aureus | 1  | 1 | 0 |
| 105 | 59-B        | blood | 19-07-2010 | aureus | 1  | 1 | 0 |
| 106 | 22-B        | blood | 19-07-2010 | aureus | 1  | 1 | 0 |
| 107 | 46-B        | blood | 19-07-2010 | aureus | 1  | 1 | 0 |
| 108 | 93-B        | blood | 19-07-2010 | aureus | 1  | 1 | 0 |
|     | Total blood |       |            |        | 99 |   |   |
|     | Total wound |       |            |        | 9  |   |   |
