# Supplementary material for: Characterization of Staphylococcus aureus from Humans and a Comparison with İsolates of Animal Origin, in North Dakota, United States
Source: PubMed Central journal article supplement (PMC4618867; doi:10.1371/journal.pone.0140497), 2015-10-20
Supplement: pone.0140497.s004.pdf [file pone.0140497.s004.pdf]

| NI   | Linc |   |   | Line |   |   | Nit |    |   | Pen |    |    | Qui |       |   | Str |   |   | Tet |      |   |   |   |      |   |  |    |  |  |
|------|------|---|---|------|---|---|-----|----|---|-----|----|----|-----|-------|---|-----|---|---|-----|------|---|---|---|------|---|--|----|--|--|
|      | R    | I | S | NI   | R | I | S   | NI | R | I   | S  | NI | R   | I     | S | NI  | R | I | S   | NI   | R | I | S | NI   | R |  |    |  |  |
|      |      |   |   | ≤1   |   |   | 2   |    |   |     | 16 |    | >16 |       |   |     |   |   |     | ≤0.5 |   |   |   | ≤512 |   |  | ≤1 |  |  |
| ≤128 |      |   |   | ≤1   |   |   | 2   |    |   |     | 16 |    | 16  |       |   |     |   |   |     | ≤0.5 |   |   |   | ≤512 |   |  | ≤1 |  |  |
| ≤128 |      |   |   | >8   |   |   | 2   |    |   |     | 16 |    | 8   |       |   |     |   |   |     | ≤0.5 |   |   |   | ≤512 |   |  | ≤1 |  |  |
| ≤128 |      |   |   | >8   |   |   | 2   |    |   |     | 16 |    | 16  |       |   |     |   |   |     | ≤0.5 |   |   |   | ≤512 |   |  | ≤1 |  |  |
| ≤128 |      |   |   | ≤1   |   |   | 2   |    |   |     | 16 |    | 16  |       |   |     |   |   |     | ≤0.5 |   |   |   | ≤512 |   |  | ≤1 |  |  |
| ≤128 |      |   |   | >8   |   |   | 2   |    |   |     | 16 |    | 8   |       |   |     |   |   |     | ≤0.5 |   |   |   | ≤512 |   |  | ≤1 |  |  |
| ≤128 |      |   |   | ≤1   |   |   | 2   |    |   |     | 8  |    |     | ≤0.25 |   |     |   |   |     | ≤0.5 |   |   |   | ≤512 |   |  | ≤1 |  |  |
|      |      |   |   | ≤1   |   |   | 2   |    |   |     | 8  |    | >16 |       |   |     |   |   |     | ≤0.5 |   |   |   | ≤512 |   |  | ≤1 |  |  |
|      |      |   |   | ≤1   |   |   | 1   |    |   |     | 16 |    | 16  |       |   |     |   |   |     | ≤0.5 |   |   |   | ≤512 |   |  | ≤1 |  |  |
| ≤128 |      |   |   | >8   |   |   | 1   |    |   |     | 16 |    | >16 |       |   |     |   |   |     | ≤0.5 |   |   |   | ≤512 |   |  | ≤1 |  |  |
| ≤128 |      |   |   | ≤1   |   |   | 2   |    |   |     | 16 |    | 16  |       |   |     |   |   |     | ≤0.5 |   |   |   | ≤512 |   |  | ≤1 |  |  |
|      |      |   |   | ≤1   |   |   | 2   |    |   |     | 16 |    | >16 |       |   |     |   |   |     | ≤0.5 |   |   |   | ≤512 |   |  | ≤1 |  |  |
|      |      |   |   | ≤1   |   |   | 2   |    |   |     | 16 |    | 8   |       |   |     |   |   |     | ≤0.5 |   |   |   | ≤512 |   |  | ≤1 |  |  |
| ≤128 |      |   |   | >8   |   |   | 2   |    |   |     | 8  |    | 4   |       |   |     |   |   |     | ≤0.5 |   |   |   | ≤512 |   |  | ≤1 |  |  |
| ≤128 |      |   |   | ≤1   |   |   | 2   |    |   |     | 8  |    | 8   |       |   |     |   |   |     | ≤0.5 |   |   |   | ≤512 |   |  | ≤1 |  |  |
|      |      |   |   | ≤1   |   |   | 2   |    |   |     | 16 |    | >16 |       |   |     |   |   |     | ≤0.5 |   |   |   | ≤512 |   |  | ≤1 |  |  |
|      |      |   |   | >8   |   |   | 2   |    |   |     | 16 |    | 1   |       |   |     |   |   |     | ≤0.5 |   |   |   | ≤512 |   |  | ≤1 |  |  |
| ≤128 |      |   |   | >8   |   |   | 2   |    |   |     | 16 |    | 16  |       |   |     |   |   |     | ≤0.5 |   |   |   | ≤512 |   |  | ≤1 |  |  |
| ≤128 |      |   |   | >8   |   |   | 2   |    |   |     | 16 |    | 4   |       |   |     |   |   |     | ≤0.5 |   |   |   | ≤512 |   |  | ≤1 |  |  |
| ≤128 |      |   |   | >8   |   |   | 1   |    |   |     | 16 |    | 4   |       |   |     |   |   |     | ≤0.5 |   |   |   | ≤512 |   |  | ≤1 |  |  |
| ≤128 |      |   |   | >8   |   |   | 2   |    |   |     | 16 |    | 4   |       |   |     |   |   |     | ≤0.5 |   |   |   | ≤512 |   |  | ≤1 |  |  |
| ≤128 |      |   |   | >8   |   |   | 2   |    |   |     | 16 |    | 8   |       |   |     |   |   |     | ≤0.5 |   |   |   | ≤512 |   |  | ≤1 |  |  |
| ≤128 |      |   |   | >8   |   |   | 2   |    |   |     | 16 |    | 4   |       |   |     |   |   |     | ≤0.5 |   |   |   | ≤512 |   |  | ≤1 |  |  |
|      |      |   |   | >8   |   |   | 2   |    |   |     | 16 |    | >16 |       |   |     |   |   |     | ≤0.5 |   |   |   | ≤512 |   |  | 16 |  |  |
| ≤128 |      |   |   | >8   |   |   | 1   |    |   |     | 16 |    | 8   |       |   |     |   |   |     | ≤0.5 |   |   |   | ≤512 |   |  | ≤1 |  |  |
|      |      |   |   | >8   |   |   | 2   |    |   |     | 16 |    | 4   |       |   |     |   |   |     | ≤0.5 |   |   |   | ≤512 |   |  | ≤1 |  |  |
| ≤128 |      |   |   | 2    |   |   | 2   |    |   |     | 16 |    | 8   |       |   |     |   |   |     | ≤0.5 |   |   |   | ≤512 |   |  | ≤1 |  |  |
|      |      |   |   | ≤1   |   |   | 2   |    |   |     | 16 |    | >16 |       |   |     |   |   |     | ≤0.5 |   |   |   | ≤512 |   |  | ≤1 |  |  |
| ≤128 |      |   |   | ≤1   |   |   | 2   |    |   |     | 16 |    | 8   |       |   |     |   |   |     | ≤0.5 |   |   |   | ≤512 |   |  | ≤1 |  |  |
| ≤128 |      |   |   | ≤1   |   |   | 1   |    |   |     | 8  |    | 8   |       |   |     |   |   |     | ≤0.5 |   |   |   | ≤512 |   |  | ≤1 |  |  |
| ≤128 |      |   |   | ≤1   |   |   | 2   |    |   |     | 16 |    | 2   |       |   |     |   |   |     | ≤0.5 |   |   |   | ≤512 |   |  | ≤1 |  |  |
| ≤128 |      |   |   | ≤1   |   |   | 2   |    |   |     | 16 |    | >16 |       |   |     |   |   |     | ≤0.5 |   |   |   | ≤512 |   |  | ≤1 |  |  |
| ≤128 |      |   |   | >8   |   |   | 1   |    |   |     | 8  |    | 4   |       |   |     |   |   |     | ≤0.5 |   |   |   | ≤512 |   |  | ≤1 |  |  |
| ≤128 |      |   |   | ≤1   |   |   | 1   |    |   |     | 16 |    | 4   |       |   |     |   |   |     | ≤0.5 |   |   |   | ≤512 |   |  | ≤1 |  |  |
|      |      |   |   | >8   |   |   | 2   |    |   |     | 16 |    | 16  |       |   |     |   |   |     | ≤0.5 |   |   |   | ≤512 |   |  | ≤1 |  |  |
| ≤128 |      |   |   | >8   |   |   | 2   |    |   |     | 16 |    | 8   |       |   |     |   |   |     | ≤0.5 |   |   |   | ≤512 |   |  | ≤1 |  |  |
|      |      |   |   | ≤1   |   |   | 2   |    |   |     | 16 |    | 16  |       |   |     |   |   |     | ≤0.5 |   |   |   | ≤512 |   |  | ≤1 |  |  |
| ≤128 |      |   |   | >8   |   |   | 2   |    |   |     | 16 |    | 8   |       |   |     |   |   |     | ≤0.5 |   |   |   | ≤512 |   |  | ≤1 |  |  |
| ≤128 |      |   |   | >8   |   |   | 1   |    |   |     | 16 |    | 8   |       |   |     |   |   |     | ≤0.5 |   |   |   | ≤512 |   |  | ≤1 |  |  |
| ≤128 |      |   |   | >8   |   |   | 1   |    |   |     | 16 |    | 8   |       |   |     |   |   |     | ≤0.5 |   |   |   | ≤512 |   |  | ≤1 |  |  |
| ≤128 |      |   |   | ≤1   |   |   | 1   |    |   |     | 4  |    |     | ≤0.25 |   |     |   |   |     | ≤0.5 |   |   |   | ≤512 |   |  | ≤1 |  |  |
|      |      |   |   | ≤1   |   |   | 1   |    |   |     | 8  |    | 8   |       |   |     |   |   |     | ≤0.5 |   |   |   | ≤512 |   |  | ≤1 |  |  |
|      |      |   |   | ≤1   |   |   | 2   |    |   |     | 8  |    |     | ≤0.25 |   |     |   |   |     | ≤0.5 |   |   |   | ≤512 |   |  | ≤1 |  |  |
| ≤128 |      |   |   | >8   |   |   | 1   |    |   |     | 4  |    | 1   |       |   |     |   |   |     | ≤0.5 |   |   |   | ≤512 |   |  | ≤1 |  |  |
| ≤128 |      |   |   | >8   |   |   | 2   |    |   |     | 8  |    | 8   |       |   |     |   |   |     | ≤0.5 |   |   |   | ≤512 |   |  | ≤1 |  |  |
| ≤128 |      |   |   | >8   |   |   | 1   |    |   |     | 8  |    | 4   |       |   |     |   |   |     | ≤0.5 |   |   |   | ≤512 |   |  | ≤1 |  |  |
| ≤128 |      |   |   | ≤1   |   |   | 2   |    |   |     | 16 |    | >16 |       |   |     |   |   |     | ≤0.5 |   |   |   | ≤512 |   |  | 32 |  |  |
| ≤128 |      |   |   | ≤1   |   |   | 2   |    |   |     | 8  |    |     | ≤0.25 |   |     |   |   |     | ≤0.5 |   |   |   | ≤512 |   |  | ≤1 |  |  |
| ≤128 |      |   |   | >8   |   |   | 1   |    |   |     | 8  |    | 2   |       |   |     |   |   |     | ≤0.5 |   |   |   | ≤512 |   |  | ≤1 |  |  |

|      |  |    |      |    |     |       |      |      |    |
|------|--|----|------|----|-----|-------|------|------|----|
| ≤128 |  | ≤1 | 1    | 16 | 8   |       | ≤0.5 | ≤512 | ≤1 |
| ≤128 |  | >8 | 1    | 8  | 4   |       | ≤0.5 | ≤512 | ≤1 |
| ≤128 |  | ≤1 | 2    | 16 | 16  |       | ≤0.5 | ≤512 | ≤1 |
| ≤128 |  | >8 | ≤0.5 | 4  | 8   |       | ≤0.5 | ≤512 | ≤1 |
| ≤128 |  | >8 | 2    | 32 | 4   |       | ≤0.5 | ≤512 | ≤1 |
| ≤128 |  | ≤1 | 2    | 8  | 1   |       | ≤0.5 | ≤512 | ≤1 |
| ≤128 |  | ≤1 | 2    | 8  |     | ≤0.25 | ≤0.5 | ≤512 | ≤1 |
| ≤128 |  | >8 | 2    | 8  | 16  |       | ≤0.5 | ≤512 | ≤1 |
| ≤128 |  | ≤1 | 2    | 8  | 8   |       | ≤0.5 | ≤512 | ≤1 |
| ≤128 |  | >8 | 2    | 16 | 8   |       | ≤0.5 | ≤512 | ≤1 |
|      |  | ≤1 | ≤0.5 | 8  | 16  |       | ≤0.5 | ≤512 | ≤1 |
| ≤128 |  | >8 | 2    | 16 | 16  |       | ≤0.5 | ≤512 | ≤1 |
|      |  | ≤1 | 2    | 16 | 16  |       | ≤0.5 | ≤512 | ≤1 |
|      |  | >8 | 2    | 16 | 1   |       | ≤0.5 | ≤512 | ≤1 |
|      |  | >8 | 2    | 16 | 16  |       | ≤0.5 | ≤512 | ≤1 |
|      |  | >8 | 1    | 8  | 4   |       | ≤0.5 | ≤512 | ≤1 |
|      |  | 8  | 1    | 8  | >16 |       | ≤0.5 | ≤512 | ≤1 |
|      |  | >8 | 2    | 16 | >16 |       | ≤0.5 | ≤512 | ≤1 |
|      |  | >8 | 2    | 16 | 4   |       | ≤0.5 | ≤512 | ≤1 |
| ≤128 |  | 2  | 1    | 16 | 8   |       | ≤0.5 | ≤512 | ≤1 |
|      |  | ≤1 | 2    | 16 | >16 |       | ≤0.5 | ≤512 | ≤1 |
|      |  | >8 | 1    | 16 | >16 |       | ≤0.5 | ≤512 | 32 |
|      |  | >8 | 2    | 16 | 16  | >16   |      | ≤512 | 8  |
| ≤128 |  | ≤1 | 2    | 8  | >16 |       | ≤0.5 | ≤512 | ≤1 |
|      |  | ≤1 | 2    | 16 | >16 |       | ≤0.5 | ≤512 | ≤1 |
|      |  | >8 | 2    | 16 | 8   |       | ≤0.5 | ≤512 | ≤1 |
| ≤128 |  | >8 | 2    | 16 | 8   |       | ≤0.5 | ≤512 | ≤1 |
| ≤128 |  | >8 | 2    | 16 | >16 |       | ≤0.5 | ≤512 | ≤1 |
| ≤128 |  | ≤1 | 1    | 16 | >16 |       | ≤0.5 | ≤512 | ≤1 |
|      |  | >8 | 2    | 16 | 8   |       | ≤0.5 | ≤512 | ≤1 |
|      |  | >8 | 2    | 16 | 16  |       | ≤0.5 | ≤512 | ≤1 |
|      |  | >8 | 2    | 16 | 16  |       | ≤0.5 | ≤512 | ≤1 |
|      |  | >8 | 1    | 16 | 4   |       | ≤0.5 | ≤512 | ≤1 |
|      |  | ≤1 | 2    | 16 | 16  |       | ≤0.5 | ≤512 | ≤1 |
| ≤128 |  | >8 | 2    | 16 | 16  |       | ≤0.5 | ≤512 | ≤1 |
| ≤128 |  | ≤1 | 2    | 8  | 16  |       | ≤0.5 | ≤512 | ≤1 |
| ≤128 |  | ≤1 | 2    | 16 | 16  |       | ≤0.5 | ≤512 | ≤1 |
| ≤128 |  | ≤1 | 2    | 16 | 16  |       | ≤0.5 | ≤512 | ≤1 |
| ≤128 |  | >8 | 2    | 16 | >16 |       | ≤0.5 | ≤512 | ≤1 |
|      |  | >8 | 2    | 16 | 16  |       | ≤0.5 | ≤512 | ≤1 |
|      |  | 2  | 2    | 16 | >16 |       | ≤0.5 | ≤512 | ≤1 |
| ≤128 |  | >8 | 2    | 16 | 8   |       | ≤0.5 | ≤512 | ≤1 |
| ≤128 |  | ≤1 | 2    | 16 | 16  |       | ≤0.5 | ≤512 | ≤1 |
| ≤128 |  | ≤1 | 2    | 16 | 2   |       | ≤0.5 | ≤512 | ≤1 |
| ≤128 |  | >8 | 1    | 16 | 16  |       | ≤0.5 | ≤512 | ≤1 |
| ≤128 |  | >8 | 2    | 16 | 16  |       | ≤0.5 | ≤512 | ≤1 |
| ≤128 |  | >8 | 1    | 16 | >16 |       | ≤0.5 | ≤512 | ≤1 |
|      |  | >8 | 2    | 16 | 16  |       | ≤0.5 | ≤512 | ≤1 |
|      |  | ≤1 | 2    | 16 | 16  |       | ≤0.5 | ≤512 | ≤1 |
| ≤128 |  | ≤1 | 2    | 16 | 4   |       | ≤0.5 | ≤512 | ≤1 |
| ≤128 |  | ≤1 | 2    | 16 | 8   |       | ≤0.5 | ≤512 | ≤1 |

|      |  |  |    |      |   |  |    |     |       |   |      |  |      |  |     |  |
|------|--|--|----|------|---|--|----|-----|-------|---|------|--|------|--|-----|--|
|      |  |  | ≤1 |      | 2 |  | 16 | >16 |       |   | ≤0.5 |  | ≤512 |  | ≤1  |  |
|      |  |  | >8 |      | 2 |  | 8  | >16 |       |   | ≤0.5 |  | ≤512 |  | ≤1  |  |
| ≤128 |  |  | ≤1 |      | 1 |  | 8  | >16 |       |   | ≤0.5 |  | ≤512 |  | ≤1  |  |
|      |  |  | >8 |      | 1 |  | 16 | 8   |       |   | ≤0.5 |  | ≤512 |  | ≤1  |  |
| ≤128 |  |  | ≤1 |      | 2 |  | 8  | 16  |       |   | ≤0.5 |  | ≤512 |  | ≤1  |  |
| ≤128 |  |  | >8 |      | 2 |  | 16 | 16  |       |   | ≤0.5 |  | ≤512 |  | ≤1  |  |
| ≤128 |  |  | >8 |      | 2 |  | 16 | >16 |       |   | ≤0.5 |  | ≤512 |  | ≤1  |  |
| ≤128 |  |  | >8 |      | 2 |  | 16 | >16 |       |   | ≤0.5 |  | ≤512 |  | ≤1  |  |
| ≤128 |  |  | ≤1 |      | 2 |  | 8  | 2   |       |   | ≤0.5 |  | ≤512 |  | ≤1  |  |
| ≤128 |  |  | >8 |      | 1 |  | 8  | 4   |       |   | ≤0.5 |  | ≤512 |  | ≤1  |  |
| ≤128 |  |  | ≤1 |      | 2 |  | 16 | 4   |       |   | ≤0.5 |  | ≤512 |  | ≤1  |  |
|      |  |  | 4  |      | 2 |  | 16 | 8   |       |   | ≤0.5 |  | ≤512 |  | ≤1  |  |
| ≤128 |  |  | ≤1 |      | 2 |  | 16 | 0,5 |       |   | ≤0.5 |  | ≤512 |  | ≤1  |  |
| ≤128 |  |  | ≤1 |      | 2 |  | 8  | 4   |       |   | ≤0.5 |  | ≤512 |  | ≤1  |  |
| ≤128 |  |  | ≤1 |      | 2 |  | 8  | 4   |       |   | ≤0.5 |  | ≤512 |  | ≤1  |  |
| ≤128 |  |  | ≤1 |      | 2 |  | 16 | 0,5 |       |   | ≤0.5 |  | ≤512 |  | ≤1  |  |
| ≤128 |  |  | 2  |      | 2 |  | 16 |     | ≤0.25 |   | ≤0.5 |  | ≤512 |  | 4   |  |
| ≤128 |  |  | ≤1 |      | 2 |  | 16 | 0,5 |       |   | ≤0.5 |  | ≤512 |  | ≤1  |  |
| ≤128 |  |  | 8  |      | 2 |  | 8  | 16  |       |   | ≤0.5 |  | ≤512 |  | 16  |  |
| ≤128 |  |  | >8 |      | 1 |  | 16 | 4   |       |   | ≤0.5 |  | ≤512 |  | >32 |  |
|      |  |  | >8 |      | 2 |  | 16 | 2   |       |   | ≤0.5 |  | ≤512 |  | ≤1  |  |
| ≤128 |  |  | ≤1 |      | 2 |  | 16 | 2   |       |   | ≤0.5 |  | ≤512 |  | ≤1  |  |
|      |  |  | >8 |      | 2 |  | 16 | 16  |       |   | ≤0.5 |  | ≤512 |  | ≤1  |  |
|      |  |  | >8 |      | 1 |  | 8  | >16 |       |   | ≤0.5 |  | ≤512 |  | >32 |  |
| ≤128 |  |  | ≤1 |      | 2 |  | 16 | 4   |       |   | ≤0.5 |  | ≤512 |  | ≤1  |  |
| ≤128 |  |  | ≤1 |      | 2 |  | 16 | 4   |       |   | ≤0.5 |  | ≤512 |  | ≤1  |  |
| ≤128 |  |  | ≤1 |      | 2 |  | 16 | 4   |       |   | ≤0.5 |  | ≤512 |  | ≤1  |  |
| ≤128 |  |  | ≤1 |      | 2 |  | 8  | 8   |       |   | ≤0.5 |  | ≤512 |  | ≤1  |  |
| ≤128 |  |  | ≤1 |      | 2 |  | 8  | 2   |       |   | ≤0.5 |  | ≤512 |  | ≤1  |  |
| ≤128 |  |  | ≤1 |      | 2 |  | 8  | 2   |       |   | ≤0.5 |  | ≤512 |  | ≤1  |  |
| ≤128 |  |  | ≤1 |      | 2 |  | 16 | 8   |       |   | ≤0.5 |  | ≤512 |  | ≤1  |  |
| ≤128 |  |  | ≤1 | ≤0.5 |   |  | 8  | 0,5 |       |   | ≤0.5 |  | ≤512 |  | ≤1  |  |
|      |  |  | 8  |      | 2 |  | 16 | 8   |       |   | ≤0.5 |  | ≤512 |  | >32 |  |
| ≤128 |  |  | 2  |      | 2 |  | 8  |     | ≤0.25 |   | ≤0.5 |  | ≤512 |  | 2   |  |
| ≤128 |  |  | ≤1 |      | 2 |  | 8  | 8   |       |   | ≤0.5 |  | ≤512 |  | ≤1  |  |
| ≤128 |  |  | ≤1 |      | 2 |  | 16 | 0,5 |       |   | ≤0.5 |  | ≤512 |  | ≤1  |  |
| ≤128 |  |  | ≤1 |      | 2 |  | 16 | 8   |       |   | ≤0.5 |  | ≤512 |  | ≤1  |  |
| ≤128 |  |  | ≤1 |      | 1 |  | 8  | 2   |       |   | ≤0.5 |  | ≤512 |  | ≤1  |  |
| ≤128 |  |  | ≤1 |      | 2 |  | 16 | 4   |       |   | ≤0.5 |  | ≤512 |  | 4   |  |
| ≤128 |  |  | ≤1 |      | 2 |  | 16 | 4   |       |   | ≤0.5 |  | ≤512 |  | ≤1  |  |
| ≤128 |  |  | ≤1 |      | 2 |  | 16 | 0,5 |       |   | ≤0.5 |  | ≤512 |  | ≤1  |  |
| ≤128 |  |  | ≤1 |      | 2 |  | 16 | 8   |       |   | ≤0.5 |  | ≤512 |  | ≤1  |  |
|      |  |  | 2  |      | 2 |  | 16 | 16  |       | 1 |      |  | ≤512 |  | ≤1  |  |
| ≤128 |  |  | ≤1 |      | 2 |  | 16 | 8   |       |   | ≤0.5 |  | ≤512 |  | ≤1  |  |
| ≤128 |  |  | >8 |      | 2 |  | 16 | 16  |       |   | ≤0.5 |  | ≤512 |  | ≤1  |  |
|      |  |  | 4  |      | 1 |  | 16 | 8   |       |   | ≤0.5 |  | ≤512 |  | >32 |  |
| ≤128 |  |  | ≤1 |      | 2 |  | 16 | 4   |       |   | ≤0.5 |  | ≤512 |  | ≤1  |  |
| ≤128 |  |  | ≤1 |      | 2 |  | 16 | 8   |       |   | ≤0.5 |  | ≤512 |  | ≤1  |  |
| ≤128 |  |  | 2  |      | 2 |  | 16 | 0,5 |       |   | ≤0.5 |  | ≤512 |  | ≤1  |  |
| ≤128 |  |  | ≤1 |      | 2 |  | 16 | 16  |       |   | ≤0.5 |  | ≤512 |  | ≤1  |  |



| Tig |   |      | Tyl |   |   | Van |   |   |   | Total Resist |    |
|-----|---|------|-----|---|---|-----|---|---|---|--------------|----|
| I   | S | NI   | R   | I | S | NI  | R | I | S |              | NI |
|     |   | 0,25 |     |   |   | 2   |   |   | 1 |              | 4  |
|     |   | 0,5  |     |   |   | 2   |   |   | 1 |              | 3  |
|     |   | 0,5  |     |   |   | >32 |   |   | 1 |              | 3  |
|     |   | 0,5  |     |   |   | >32 |   |   | 1 |              | 3  |
|     |   | 0,5  |     |   |   | 1   |   |   | 1 |              | 2  |
|     |   | 0,06 |     |   |   | >32 |   |   | 1 |              | 3  |
|     |   | 0,06 |     |   |   | 1   |   |   | 1 |              | 1  |
|     |   | 0,06 |     |   |   | 1   |   |   | 1 |              | 4  |
|     |   | 0,06 |     |   |   | 2   |   |   | 1 |              | 4  |
|     |   | 0,12 |     |   |   | >32 |   |   | 1 |              | 3  |
|     |   | >0.5 |     |   |   | 1   |   |   | 1 |              | 2  |
|     |   | 0,25 |     |   |   | 2   |   |   | 1 |              | 3  |
|     |   | 0,12 |     |   |   | 2   |   |   | 1 |              | 4  |
|     |   | 0,12 |     |   |   | >32 |   |   | 1 |              | 3  |
|     |   | 0,25 |     |   |   | 1   |   |   | 1 |              | 3  |
|     |   | 0,5  |     |   |   | 2   |   |   | 1 |              | 4  |
|     |   | 0,25 |     |   |   | >32 |   |   | 2 |              | 4  |
|     |   | 0,12 |     |   |   | >32 |   |   | 1 |              | 3  |
|     |   | 0,25 |     |   |   | >32 |   |   | 2 |              | 3  |
|     |   | 0,12 |     |   |   | >32 |   |   | 1 |              | 3  |
|     |   | 0,25 |     |   |   | >32 |   |   | 1 |              | 3  |
|     |   | 0,5  |     |   |   | >32 |   |   | 1 |              | 3  |
|     |   | 0,25 |     |   |   | >32 |   |   | 1 |              | 3  |
|     |   | 0,25 |     |   |   | >23 |   |   | 1 |              | 5  |
|     |   | 0,12 |     |   |   | >32 |   |   | 1 |              | 3  |
|     |   | 0,25 |     |   |   | >32 |   |   | 2 |              | 4  |
|     |   | 0,25 |     |   |   | 4   |   |   | 1 |              | 3  |
|     |   | 0,25 |     |   |   | 2   |   |   | 2 |              | 4  |
|     |   | 0,12 |     |   |   | 1   |   |   | 1 |              | 3  |
|     |   | 0,06 |     |   |   | 1   |   |   | 1 |              | 3  |
|     |   | 0,12 |     |   |   | 1   |   |   | 1 |              | 3  |
|     |   | 0,25 |     |   |   | 2   |   |   | 1 |              | 1  |
|     |   | 0,5  |     |   |   | >32 |   |   | 1 |              | 3  |
|     |   | 0,12 |     |   |   | 1   |   |   | 1 |              | 3  |
|     |   | 0,12 |     |   |   | >32 |   |   | 2 |              | 5  |
|     |   | 0,5  |     |   |   | >32 |   |   | 2 |              | 4  |
|     |   | 0,25 |     |   |   | 1   |   |   | 1 |              | 3  |
|     |   | 0,25 |     |   |   | >32 |   |   | 1 |              | 3  |
|     |   | 0,25 |     |   |   | >32 |   |   | 1 |              | 3  |
|     |   | 0,25 |     |   |   | >32 |   |   | 1 |              | 3  |
|     |   | 0,25 |     |   |   | 1   |   |   | 1 |              | 1  |
|     |   | 0,5  |     |   |   | 1   |   |   | 1 |              | 3  |
|     |   | 0,12 |     |   |   | 1   |   |   | 1 |              | 3  |
|     |   | 0,5  |     |   |   | >32 |   |   | 1 |              | 3  |
|     |   | 0,12 |     |   |   | >32 |   |   | 1 |              | 3  |
|     |   | 0,25 |     |   |   | >32 |   |   | 1 |              | 3  |
|     |   | 0,12 |     |   |   | 1   |   |   | 1 |              | 3  |
|     |   | 0,12 |     |   |   | 1   |   |   | 2 |              | 2  |
|     |   | 0,12 |     |   |   | >32 |   |   | 2 |              | 3  |

|  |      |  |  |     |  |     |   |
|--|------|--|--|-----|--|-----|---|
|  | 0,5  |  |  | 1   |  | 1   | 3 |
|  | 0,5  |  |  | >32 |  | 1   | 3 |
|  | 0,5  |  |  | 1   |  | 1   | 1 |
|  | 0,12 |  |  | >32 |  | 0,5 | 3 |
|  | 0,5  |  |  | >32 |  | 1   | 3 |
|  | 0,25 |  |  | 0,5 |  | 2   | 3 |
|  | 0,5  |  |  | 1   |  | 1   | 0 |
|  | 0,5  |  |  | >32 |  | 2   | 3 |
|  | 0,5  |  |  | 1   |  | 1   | 1 |
|  | 0,5  |  |  | >32 |  | 1   | 3 |
|  | 0,25 |  |  | 1   |  | 2   | 5 |
|  | 0,5  |  |  | >32 |  | 1   | 3 |
|  | 0,5  |  |  | 1   |  | 1   | 4 |
|  | 0,12 |  |  | 32  |  | 2   | 5 |
|  | 0,25 |  |  | >32 |  | 2   | 5 |
|  | 0,5  |  |  | >32 |  | 0,5 | 5 |
|  | 0,5  |  |  | 1   |  | 2   | 4 |
|  | 0,25 |  |  | >32 |  | 1   | 4 |
|  | 0,5  |  |  | >32 |  | 1   | 4 |
|  | 0,12 |  |  | 1   |  | 1   | 3 |
|  | 0,5  |  |  | 2   |  | 1   | 4 |
|  | 0,5  |  |  | >32 |  | 1   | 5 |
|  | 0,5  |  |  | >32 |  | 1   | 5 |
|  | 0,25 |  |  | 1   |  | 1   | 2 |
|  | 0,12 |  |  | 2   |  | 1   | 4 |
|  | 0,06 |  |  | 32  |  | 2   | 4 |
|  | 0,25 |  |  | 32  |  | 1   | 3 |
|  | 0,12 |  |  | >32 |  | 1   | 3 |
|  | 0,12 |  |  | 2   |  | 1   | 2 |
|  | 0,5  |  |  | >32 |  | 1   | 4 |
|  | 0,12 |  |  | >32 |  | 1   | 4 |
|  | 0,25 |  |  | >32 |  | 1   | 4 |
|  | 0,12 |  |  | >32 |  | 1   | 4 |
|  | 0,12 |  |  | 1   |  | 1   | 4 |
|  | 0,25 |  |  | >32 |  | 1   | 3 |
|  | 0,5  |  |  | 2   |  | 1   | 1 |
|  | 0,5  |  |  | 2   |  | 1   | 2 |
|  | 0,5  |  |  | 2   |  | 1   | 3 |
|  | 0,5  |  |  | >32 |  | 1   | 3 |
|  | 0,5  |  |  | >32 |  | 2   | 4 |
|  | 0,12 |  |  | 2   |  | 1   | 4 |
|  | 0,5  |  |  | >32 |  | 1   | 3 |
|  | 0,12 |  |  | 1   |  | 1   | 3 |
|  | 0,25 |  |  | 1   |  | 1   | 2 |
|  | 0,25 |  |  | >32 |  | 1   | 3 |
|  | 0,25 |  |  | >32 |  | 1   | 3 |
|  | 0,5  |  |  | >32 |  | 1   | 3 |
|  | 0,12 |  |  | >32 |  | 1   | 4 |
|  | 0,06 |  |  | 1   |  | 1   | 4 |
|  | 0,06 |  |  | 2   |  | 1   | 1 |
|  | 0,25 |  |  | 1   |  | 1   | 3 |

|  |      |  |     |  |   |   |
|--|------|--|-----|--|---|---|
|  | 0,5  |  | 32  |  | 2 | 4 |
|  | 0,5  |  | 8   |  | 1 | 4 |
|  | 0,12 |  | 2   |  | 1 | 1 |
|  | 0,12 |  | >32 |  | 1 | 4 |
|  | 0,12 |  | >32 |  | 1 | 3 |
|  | 0,25 |  | >32 |  | 1 | 3 |
|  | 0,12 |  | 2   |  | 1 | 3 |
|  | 0,25 |  | 1   |  | 1 | 3 |
|  | >.5  |  | 2   |  | 1 | 1 |
|  | 0,5  |  | >32 |  | 1 | 3 |
|  | 0,12 |  | 1   |  | 1 | 1 |
|  | 0,12 |  | 16  |  | 1 | 3 |
|  | 0,12 |  | 4   |  | 1 | 1 |
|  | 0,25 |  | 1   |  | 1 | 2 |
|  | 0,12 |  | 2   |  | 1 | 2 |
|  | 0,12 |  | 2   |  | 1 | 1 |
|  | 0,12 |  | 4   |  | 1 | 1 |
|  | 0,12 |  | 1   |  | 1 | 1 |
|  | 0,25 |  | 4   |  | 1 | 3 |
|  | 0,5  |  | >32 |  | 1 | 3 |
|  | 0,12 |  | >32 |  | 1 | 4 |
|  | 0,25 |  | 16  |  | 1 | 1 |
|  | 0,25 |  | >32 |  | 1 | 4 |
|  | 0,25 |  | >32 |  | 2 | 5 |
|  | 0,5  |  | 2   |  | 1 | 2 |
|  | 0,25 |  | 2   |  | 1 | 1 |
|  | 0,12 |  | 1   |  | 1 | 1 |
|  | 0,12 |  | 2   |  | 1 | 2 |
|  | 0,12 |  | 1   |  | 1 | 1 |
|  | 0,12 |  | 1   |  | 1 | 2 |
|  | 0,12 |  | 4   |  | 1 | 3 |
|  | 0,25 |  | 4   |  | 1 | 1 |
|  | 0,25 |  | 8   |  | 1 | 5 |
|  | 0,12 |  | 1   |  | 1 | 1 |
|  | 0,25 |  | 2   |  | 1 | 1 |
|  | 0,06 |  | 1   |  | 1 | 1 |
|  | 0,25 |  | 2   |  | 1 | 1 |
|  | 0,25 |  | 2   |  | 1 | 2 |
|  | 0,12 |  | 8   |  | 1 | 2 |
|  | 0,12 |  | 1   |  | 1 | 1 |
|  | 0,25 |  | 2   |  | 1 | 1 |
|  | 0,5  |  | 2   |  | 1 | 3 |
|  | 0,06 |  | 8   |  | 1 | 3 |
|  | 0,06 |  | 2   |  | 1 | 2 |
|  | 0,25 |  | >32 |  | 1 | 3 |
|  | 0,12 |  | 1   |  | 1 | 5 |
|  | 0,25 |  | 2   |  | 1 | 2 |
|  | 0,25 |  | 2   |  | 1 | 2 |
|  | 0,12 |  | 1   |  | 1 | 2 |
|  | 0,12 |  | 2   |  | 1 | 1 |

1 TOTAL 0
